# Supplementary material for: Diffusion tensor imaging point to ongoing functional impairment in HIV-infected children at age 5, undetectable using standard neurodevelopmental assessments
Source: AIDS Res Ther. 2020 May 19;17:20. doi: 10.1186/s12981-020-00278-z (PMC7236356; doi:10.1186/s12981-020-00278-z)
Supplement: Supplementary file 1 — Additional file 1. The dataset supporting the conclusions of this article is included within the article as an additional file nr.1. (.xls 5 year old tabular data). [file 12981_2020_278_MOESM1_ESM.xlsx]

## Sheet: Sheet1
Studyid	Gender	Birthweight	Age scan yrs	Age months	Group	CD 4 COUNT(B)	CD4%(B)	CD 8(B)	Viral load (B)	cd4(nadir)	cd4%(nadir)	cd8(nadir)	Viral load(nadir)	CD4 count(scan)	CD4%(scan)	CD8(scan)	Viral load(scan)	Interrupted	Age start ART/wks	Age at start category	Rx period weeks	FA 1	FA 2	RD(FA) 1	RD(FA) 2	AD(FA) 1	AD(FA) 2	MD 1	MD 2	MD 3	MD 4	MD 5	MD 6	MD 7	RD(MD) 1	RD(MD) 2	RD(MD) 3	RD(MD) 4	RD(MD) 5	RD(MD) 6	RD(MD) 7	AD(MD) 1	AD(MD) 2	AD(MD) 3	AD(MD) 4	AD(MD) 5	AD(MD) 6	AD(MD) 7	Date of Griffiths
310614	Male	3560	5.6	67.2	control	NA	NA	NA	NA	NA	NA	NA	NA	NA	NA	NA	NA	NA	NA		NA	0.437142	0.488688	0.569128	0.554598	1.16738	1.28345	0.818821	0.799772	0.796883	0.844414	0.827641	0.838947	0.81536	0.622187	0.582641	0.580441	0.648833	0.639245	0.618753	0.619666	1.21209	1.23403	1.22977	1.23558	1.20443	1.27934	1.20675	2010-04-23
312754	Male	2772	6.2	74.4	control	NA	NA	NA	NA	NA	NA	NA	NA	NA	NA	NA	NA	NA	NA		NA	0.451921	0.468668	0.568144	0.566493	1.20807	1.17177	0.822455	0.802789	0.800144	0.842997	0.844539	0.820666	0.851008	0.610406	0.584759	0.569663	0.651764	0.615695	0.617673	0.616426	1.24655	1.23885	1.26111	1.22546	1.30223	1.22665	1.32017	2010-05-27
315814	Female	2958	5.3	63.6	control	NA	NA	NA	NA	NA	NA	NA	NA	NA	NA	NA	NA	NA	NA		NA	0.487366	0.480682	0.510963	0.521561	1.2033	1.15181	0.767545	0.759149	0.77139	0.809635	0.782623	0.785925	0.778716	0.576437	0.562343	0.533125	0.659901	0.612186	0.563899	0.586065	1.14976	1.15276	1.24792	1.1091	1.1235	1.22998	1.16402	2010-07-07
315964	Female	3010	6.1	73.2	control	NA	NA	NA	NA	NA	NA	NA	NA	NA	NA	NA	NA	NA	NA		NA	0.437309	0.435159	0.592969	0.591165	1.15078	1.15055	0.810195	0.785839	0.799382	0.827405	0.805909	0.805836	0.771001	0.619744	0.592398	0.576256	0.665542	0.60299	0.654139	0.576005	1.1911	1.17272	1.24563	1.15113	1.21175	1.10923	1.16099	2010-06-24
317824	Female	3310	5.1	61.2	control	NA	NA	NA	NA	NA	NA	NA	NA	NA	NA	NA	NA	NA	NA		NA	0.517171	0.477543	0.513083	0.564276	1.2468	1.2315	0.798101	0.77871	0.801351	0.88111	0.809135	0.83099	0.80304	0.615527	0.579513	0.59661	0.708449	0.658437	0.647419	0.58071	1.16325	1.17711	1.21083	1.22643	1.11053	1.19813	1.2477	2010-07-05
318014	Male	4150	5.1	61.2	control	NA	NA	NA	NA	NA	NA	NA	NA	NA	NA	NA	NA	NA	NA		NA	0.497028	0.456595	0.545793	0.605064	1.2635	1.22321	0.836521	0.82599	0.796827	0.878114	0.871001	0.841921	0.852532	0.62956	0.605931	0.575399	0.670904	0.684014	0.66407	0.649734	1.25044	1.26611	1.23968	1.29253	1.24497	1.19762	1.25813	2010-07-22
318404	Female	2820	5.1	61.2	control	NA	NA	NA	NA	NA	NA	NA	NA	NA	NA	NA	NA	NA	NA		NA	0.488725	0.49484	0.549314	0.592462	1.25202	1.19624	0.825278	0.81268	0.866886	0.851916	0.826142	0.839028	0.847362	0.628422	0.599244	0.612741	0.667939	0.604076	0.653432	0.61683	1.21899	1.23955	1.37517	1.21987	1.27027	1.21022	1.30842	2010-08-05
315324	Female	3600	5.5	66	control	NA	NA	NA	NA	NA	NA	NA	NA	NA	NA	NA	NA	NA	NA		NA	0.44364	0.486246	0.585324	0.574274	1.17715	1.26394	0.835364	0.827024	0.804455	0.856232	0.831167	0.862463	0.844856	0.65317	0.638954	0.584939	0.67395	0.624937	0.676615	0.643491	1.19975	1.20317	1.24349	1.2208	1.24363	1.23416	1.24759	2010-06-17
330035	Male	2565	6.2	74.4	control	NA	NA	NA	NA	NA	NA	NA	NA	NA	NA	NA	NA	NA	NA		NA	0.444865	0.557233	0.566848	0.513929	1.1777	1.26727	0.816865	0.78821	0.810471	0.824425	0.823176	0.840002	0.847827	0.626112	0.573336	0.590722	0.656397	0.63722	0.677893	0.640168	1.19837	1.21796	1.24997	1.16048	1.19509	1.16422	1.26315	2012-08-31
330015	Female	3760	5.8	69.6	control	NA	NA	NA	NA	NA	NA	NA	NA	NA	NA	NA	NA	NA	NA		NA	0.482757	0.479725	0.536685	0.537304	1.21521	1.10201	0.783845	0.773639	0.814027	0.828795	0.789431	0.804006	0.811851	0.592888	0.578128	0.581908	0.634809	0.599551	0.620369	0.618712	1.16576	1.16466	1.27826	1.21677	1.16919	1.17128	1.19813	2012-07-19
330025	Female	2480	6.1	73.2	control	NA	NA	NA	NA	NA	NA	NA	NA	NA	NA	NA	NA	NA	NA		NA	0.455506	0.539074	0.554797	0.51293	1.18685	1.30829	0.806623	0.784472	0.794249	0.809746	0.82909	0.799132	0.782787	0.607438	0.565242	0.589952	0.661365	0.643135	0.629991	0.582581	1.20499	1.22293	1.20284	1.10651	1.201	1.13741	1.1832	2012-07-23
330446	Female	2640	5.2	62.4	HIV+	1294	27.85	1290	528000	480	13.2	562	428000	1,171	38.60	770	399	no	64.28	>=12	208	0.385794	0.526659	0.620843	0.527162	1.19256	1.30287	0.850222	0.829807	0.875188	0.844251	0.865913	0.861734	0.869929	0.66493	0.609279	0.654841	0.671195	0.65157	0.657391	0.658919	1.22081	1.27086	1.31588	1.19036	1.2946	1.27042	1.29195	2010-08-25
331386	Male	2900	5.5	66	HIV+	2011	25.60	4337	750001	441	11.7	580	750001	919	35.60	945	399	no	20.85	>=12	268	0.447244	0.433232	0.56399	0.570823	1.17318	1.10634	0.816526	0.788244	0.83136	0.850764	0.824754	0.822085	0.832508	0.614097	0.564744	0.605081	0.679852	0.642032	0.66093	0.620992	1.22138	1.23524	1.28392	1.19259	1.1902	1.1444	1.25554	2011-03-04
331412	Female	3200	5.5	66	HIV+	2,203	37.10	1,877	171000	1043	25.8	955	126600	2,068	41.20	1,571	399	yes	7.28	<12	180.286	0.430258	0.451811	0.616406	0.577873	1.23334	1.23421	0.828483	0.810507	0.84622	0.90501	0.817007	0.820025	0.815911	0.632594	0.59592	0.646714	0.737968	0.578902	0.642451	0.604029	1.22026	1.23968	1.24523	1.23909	1.29322	1.17517	1.23967	2010-12-13
331856	Male	3480	5.9	70.8	HIV+	1,668	34.80	1,390	750001	1668	34.8	461	399	2,142	56.80	604	399	no	7	<12	299.143	0.403724	0.361318	0.624271	0.675918	1.18712	1.18835	0.882511	0.855065	0.858089	0.966386	0.894268	0.910522	0.896602	0.685503	0.635522	0.635845	0.794189	0.73703	0.744533	0.702444	1.27653	1.29415	1.30258	1.31078	1.20875	1.2425	1.28492	2011-04-12
331976	Female	2465	5.2	62.4	HIV+	2,336	38.50	1,365	750001	594	14.3	637	750001	774	21.20	1,967	750,001	no	18.42	>=12	251.857	0.390001	0.38881	0.599823	0.573682	1.11058	1.06413	0.806158	0.799381	0.842852	0.834305	0.81484	0.840982	0.801336	0.596611	0.567291	0.611634	0.590986	0.596129	0.602411	0.601357	1.22525	1.26356	1.30529	1.32094	1.25226	1.31812	1.20129	2011-02-25
332276	Female	2770	5.2	62.4	HIV+	4,272	36.00	2,872	408000	593	24.9	737	36200	593	29.70	783	399	yes	6.57	<12	96.5714	0.428307	0.471825	0.599824	0.578918	1.2161	1.27254	0.861308	0.832224	0.829786	0.901541	0.904208	0.881997	0.887063	0.65613	0.602706	0.591844	0.722554	0.70971	0.661865	0.666489	1.27166	1.29126	1.30567	1.25951	1.2932	1.32226	1.32821	2011-03-07
332406	Male	3600	6.2	74.4	HIV+	2,039	33.10	2,285	750001	697	26.2	407	338000	902	39.60	581	399	no	11.85	<12	311.286	0.387902	0.455589	0.636322	0.601299	1.17733	1.13355	0.81529	0.798049	0.855418	0.808924	0.845848	0.836976	0.825504	0.607352	0.565499	0.639003	0.605352	0.617146	0.635363	0.604471	1.23116	1.26315	1.28825	1.21607	1.30325	1.2402	1.26757	2011-03-30
332526	Female	3600	5.2	62.4	HIV+	1,504	38.60	799	750001	179	20.4	183	100001	1,365	43.50	527	399	no	33.71	>=12	239.143	0.373987	0.382668	0.638631	0.651049	1.14708	1.15023	0.87039	0.848149	0.869112	0.874298	0.894189	0.859042	0.883818	0.691111	0.662475	0.673788	0.712264	0.719787	0.650343	0.710071	1.22895	1.2195	1.25976	1.19837	1.24299	1.27644	1.23131	2011-05-05
332886	Male	3500	5.9	70.8	HIV+	3,434	37.60	1,261	6020	749	20.1	520	71000	874	29.70	789	399	yes	9.71	<12	193.429	0.482849	0.40581	0.552245	0.668617	1.2275	1.19598	0.863745	0.845954	0.815301	0.87259	0.838924	0.952345	0.883679	0.644397	0.628203	0.588418	0.649842	0.649741	0.735903	0.695404	1.30244	1.28146	1.26907	1.31808	1.21729	1.38523	1.26023	2011-03-15
334166	Female	2750	4.9	58.8	HIV+	1,382	36.20	955	750001	698	18.6	579	750001	770	37.10	612	5,980	no	29.85	>=12	228	0.433912	0.493826	0.60702	0.578587	1.18268	1.26706	0.84124	0.821234	0.860246	0.880976	0.885801	0.877158	0.841892	0.638799	0.601249	0.644768	0.678707	0.658561	0.688838	0.61271	1.24612	1.2612	1.2912	1.28551	1.34028	1.2538	1.30026	2011-05-04
334436	Female	3240	5.8	69.6	HIV+	1,927	47.40	854	696000	699	24.7	332	750001	1,042	41.50	615	399	no	47.57	>=12	254.857	0.478012	0.41954	0.559695	0.597686	1.19669	1.09075	0.808548	0.791291	0.815898	0.872288	0.805925	0.810502	0.812347	0.587609	0.559246	0.587634	0.671822	0.578442	0.62587	0.558008	1.25042	1.25538	1.27243	1.27322	1.26089	1.17977	1.32103	2011-05-26
334696	Male	3400	5	60	HIV+	2,926	32.40	3,170	750001	817	15.8	815	750001	1,428	36.90	1,393	399	no	26.28	>=12	236.286	0.433792	0.430354	0.601753	0.608157	1.19892	1.28879	0.882187	0.847945	0.856298	0.895444	0.880413	0.880311	0.852342	0.66611	0.623514	0.618523	0.688	0.657959	0.671526	0.633706	1.31434	1.29681	1.33185	1.31033	1.32532	1.29788	1.28961	2011-05-05
335106	Female	3780	5.6	67.2	HIV+	3,828	49.00	1,094	510000	692	28.2	284	399	1,132	38.10	410	399	no	7.71	<12	286.143	0.384416	0.398401	0.619442	0.624705	1.1415	1.12633	0.830942	0.818861	0.852691	0.877649	0.846234	0.860846	0.851236	0.641152	0.61376	0.628118	0.69776	0.678059	0.663424	0.653242	1.21052	1.22906	1.30184	1.23743	1.18258	1.25569	1.24722	2011-05-11
335496	Female	2400	5.2	62.4	HIV+	2,240	43.20	1,493	750001	612	23.8	231	750001	1,266	29.20	1,713	399	yes	8.28	<12	203.429	0.399986	0.430845	0.599881	0.595368	1.15037	1.26034	0.852196	0.8403	0.826197	0.888605	0.881415	0.854795	0.879763	0.662498	0.628374	0.620311	0.725413	0.694099	0.668307	0.692111	1.23159	1.26415	1.23797	1.21499	1.25605	1.22777	1.25507	2011-04-29
335656	Female	2800	5.7	68.4	HIV+	1,085	31.00	801	750001	170	14.1	263	190000	539	25.00	729	8,870	no	25.57	>=12	272	0.480361	0.453852	0.569322	0.567283	1.23743	1.15931	0.836359	0.819563	0.841756	0.862687	0.850304	0.862819	0.838895	0.636642	0.597257	0.602801	0.669749	0.652635	0.66756	0.667376	1.23579	1.26418	1.31967	1.24856	1.24564	1.25334	1.18193	2011-07-20
336066	Male	3250	5.2	62.4	HIV+	2,399	34.90	1,842	750001	737	17.8	481	50600	948	24.90	1,481	399	yes	6.57	<12	231.143	0.373116	0.40433	0.628688	0.596042	1.10979	1.09778	0.832664	0.812494	0.834388	0.860828	0.814609	0.831495	0.79729	0.657022	0.612249	0.6277	0.675224	0.625	0.639209	0.575684	1.18395	1.21298	1.24776	1.23204	1.19383	1.21607	1.2405	2011-10-03
336186	Female	2790	5.1	61.2	HIV+	2,191	44.00	1,115	750001	863	31.5	422	750001	872	46.30	422	399	no	22	>=12	242.857	0.383011	0.407979	0.625135	0.605264	1.12168	1.12758	0.822987	0.807872	0.848221	0.87073	0.827053	0.871744	0.844988	0.617217	0.586506	0.621187	0.68431	0.624361	0.681964	0.66847	1.23453	1.2506	1.30229	1.24357	1.23244	1.2513	1.19803	2011-08-25
336242	Male	3300	5.1	61.2	HIV+	823	41.40	866	376000	696	11	866	83400	1,468	32.10	1,359	399	yes	11.71	<12	208.857	0.404509	0.440716	0.62927	0.551502	1.20576	1.11533	0.845313	0.832489	0.874936	0.862791	0.885185	0.873735	0.889824	0.657675	0.63029	0.645464	0.677349	0.715659	0.665076	0.655417	1.22059	1.23689	1.33388	1.23367	1.22423	1.29105	1.35864	2011-08-15
336306	Female	2900	5.3	63.6	HIV+	1,823	32.50	1,587	312000	762	21.3	987	322000	1,192	31.50	1,373	399	yes	7.28	<12	217.143	0.427921	0.400572	0.593569	0.60782	1.19042	1.11481	0.840201	0.819721	0.828922	0.884647	0.871421	0.832116	0.863005	0.650248	0.609738	0.607003	0.716061	0.679419	0.660629	0.670549	1.22011	1.23969	1.27276	1.22182	1.25543	1.17509	1.24792	2011-07-21
336456	Female	3250	5.8	69.6	HIV+	1,362	40.50	565	615000	641	32.1	175	324000	841	45.90	231	399	yes	9.14	<12	260.143	0.411626	0.497545	0.611035	0.598464	1.18976	1.1848	0.833589	0.80556	0.869547	0.884554	0.848502	0.874798	0.865637	0.647014	0.610447	0.660538	0.697151	0.657088	0.696366	0.637418	1.20674	1.19579	1.28757	1.25936	1.23133	1.23166	1.32208	2011-07-11
336926	Male	3540	5.5	66	HIV+	1,798	36.60	2,377	750001	705	17.9	531	750001	705	42.70	531	399	no	41.42	>=12	245.857	0.403724	0.361318	0.624271	0.675918	1.18712	1.18835	0.882511	0.855065	0.858089	0.966386	0.894268	0.910522	0.896602	0.685503	0.635522	0.635845	0.794189	0.73703	0.744533	0.702444	1.27653	1.29415	1.30258	1.31078	1.20875	1.2425	1.28492	2011-09-28
337286	Male	3260	5.3	63.6	HIV+	2,587	33.50	1,406	654000	322	20.2	236	750001	1,187	30.40	1,417	399	no	75.71	>=12	200.714	0.426485	0.461375	0.61071	0.60843	1.18837	1.23661	0.85496	0.837719	0.835593	0.91449	0.876809	0.8784	0.871406	0.675968	0.647846	0.636673	0.736018	0.66462	0.689391	0.678796	1.21294	1.21747	1.23343	1.27143	1.30119	1.25642	1.25663	2011-10-10
337506	Female	2610	5.6	67.2	HIV+	1,093	21.60	2,367	43200	402	18.9	349	399	517	22.20	787	399	no	8.14	<12	281.286	0.455172	0.465755	0.566326	0.571179	1.18519	1.15304	0.806663	0.796668	0.837038	0.836106	0.859303	0.84821	0.84736	0.603489	0.588638	0.594206	0.633675	0.654361	0.650764	0.666051	1.21301	1.21273	1.3227	1.24097	1.26919	1.2431	1.20998	2011-08-16
337756	Female	2660	5.3	63.6	HIV+	2,846	39.00	963	235000	374	20	463	750001	1,712	39.60	1,051	399	yes	10	<12	216.143	0.412512	0.357344	0.598074	0.599303	1.13569	1.16176	0.830102	0.812614	0.826443	0.873967	0.832112	0.826687	0.779065	0.639655	0.611602	0.620692	0.720543	0.699587	0.685993	0.629897	1.21099	1.21464	1.23794	1.18082	1.09716	1.10807	1.0774	2011-10-27
337916	Male	3200	5.1	61.2	HIV+	746	17.40	2,410	750001	387	17.4	448	750001	913	28.80	868	399	no	8	<12	259.429	0.440493	0.481244	0.59498	0.580703	1.18111	1.25737	0.868217	0.860842	0.845	0.929896	0.868604	0.883225	0.874688	0.67695	0.646243	0.622395	0.749189	0.678133	0.676309	0.698169	1.25075	1.29004	1.29021	1.29131	1.24955	1.29706	1.22773	2011-10-14
338036	Female	3300	5.5	66	HIV+	2,688	41.30	1,874	750001	599	20.8	356	399	710	27.00	1,144	399	yes	6.85	<12	95.8571	0.408726	0.418847	0.613584	0.585221	1.14227	1.10962	0.847177	0.841371	0.865707	0.862922	0.900938	0.870376	0.837323	0.666574	0.654952	0.674665	0.699492	0.749824	0.706416	0.642573	1.20838	1.21421	1.24779	1.18978	1.20317	1.19829	1.22682	2011-09-27
338686	Male	3040	5.2	62.4	HIV+	1,836	22.60	4,119	750001	807	22.6	621	399	1,062	38.10	903	399	no	7.71	<12	262.286	0.394281	0.385681	0.619437	0.65684	1.16953	1.12155	0.856512	0.841692	0.857783	0.882315	0.888329	0.856198	0.86682	0.670028	0.640859	0.649397	0.685376	0.712063	0.658234	0.683348	1.22948	1.24336	1.27455	1.27619	1.24086	1.25213	1.23376	2011-11-08
338956	Female	3640	5.5	66	HIV+	1,851	31.20	2,397	124000	474	11.2	516	271000	625	29.80	727	3,590	no	24.85	>=12	260.143	0.422995	0.4481	0.596417	0.590382	1.15739	1.19472	0.81096	0.794612	0.84668	0.864639	0.794415	0.824189	0.799657	0.625658	0.597357	0.628353	0.679063	0.558865	0.645421	0.594102	1.18157	1.18912	1.28333	1.23579	1.26552	1.18172	1.21077	2011-12-14
339156	Male	3000	5.4	64.8	HIV+	1,835	29.30	2,386	238000	1166	21.4	1630	2320	1,941	34.70	1,986	399	no	7.57	<12	276.571	0.478639	0.460327	0.563449	0.622782	1.22884	1.21375	0.850322	0.833289	0.84519	0.887685	0.883084	0.848591	0.876029	0.652551	0.620138	0.629081	0.70084	0.680254	0.65075	0.666993	1.24586	1.25959	1.27741	1.26138	1.28874	1.24427	1.2941	2011-09-26
339486	Male	3180	5.2	62.4	HIV+	3,046	29.10	2,345	439000	902	9.07	878	622000	1,103	30.40	878	399	yes	7.42	<12	235.857	0.396623	0.420513	0.606193	0.598243	1.15512	1.14541	0.835352	0.817133	0.863289	0.866971	0.841631	0.831264	0.848686	0.651294	0.619213	0.646762	0.69412	0.634902	0.633467	0.681882	1.20347	1.21297	1.29634	1.21267	1.25509	1.22686	1.18229	2011-11-15
339736	Female	3415	5.4	64.8	HIV+	935	31.80	994	338000	665	20.2	457	750001	1,066	49.10	480	399	yes	9.28	<12	226	0.379663	0.44066	0.619433	0.575106	1.15375	1.22336	0.838806	0.821551	0.848869	0.879675	0.845374	0.80727	0.856968	0.663781	0.630804	0.653485	0.710922	0.699873	0.644079	0.693515	1.18886	1.20305	1.23964	1.21718	1.13638	1.13365	1.18387	2011-10-11
339826	Female	3140	5.2	62.4	HIV+	2,635	53.90	1,129	750001	1790	30.4	1393	21900	2,234	44.00	1,503	399	no	7.14	<12	265	0.422753	0.482467	0.602709	0.506753	1.20167	1.24276	0.842386	0.82304	0.866408	0.859124	0.84566	0.828163	0.830166	0.652304	0.618959	0.653283	0.685763	0.60963	0.655126	0.574314	1.22255	1.2312	1.29266	1.20585	1.31772	1.17424	1.34187	2011-10-12
340116	Female	3400	5	60	HIV+	3,731	52.80	1,441	750001	1950	28.4	958	750001	1,950	46.10	1,075	399	no	40	>=12	221	0.469886	0.397653	0.575466	0.611037	1.26292	1.19463	0.858393	0.834875	0.836388	0.90831	0.884688	0.879105	0.866365	0.667913	0.629384	0.611904	0.73074	0.720023	0.665334	0.642267	1.23935	1.24586	1.28536	1.26345	1.21402	1.30665	1.31456	2011-10-17
340346	Female	2560	5.5	66	HIV+	1,279	46.60	522	750001	524	20.8	218	750001	1,644	27.90	2,304	399	yes	8	<12	244.857	0.435637	0.410909	0.593175	0.654081	1.21967	1.21582	0.914271	0.892472	0.839823	0.902232	0.946271	0.919478	0.940422	0.72331	0.687354	0.596658	0.706916	0.717141	0.717412	0.714622	1.29619	1.30271	1.32615	1.29287	1.40453	1.32361	1.39202	2011-11-30
340426	Female	3500	5.4	64.8	HIV+	1,345	40.60	1,139	750001	352	27	411	384000	352	28.50	411	204,000	yes	7.42	<12	96	0.408305	0.45164	0.598635	0.605453	1.1693	1.27221	0.841583	0.826178	0.83564	0.882219	0.837498	0.874871	0.852173	0.661935	0.633869	0.599478	0.713158	0.667733	0.681019	0.64962	1.20088	1.2108	1.30796	1.22034	1.17703	1.26257	1.25728	2012-01-16
360132	Female	3140	5.2	62.4	HIV+	294	12.90	917	750001	294	12.9	179	334000	607	33.20	614	399	yes	7.14	<12	258.429	0.403031	0.386138	0.628631	0.676416	1.18518	1.24028	0.896245	0.869613	0.863659	0.96061	0.935051	0.970309	0.957051	0.707705	0.65797	0.646043	0.804501	0.780568	0.78136	0.790353	1.27332	1.2929	1.29889	1.27283	1.24402	1.34821	1.29045	2010-11-03
360392	Male	3750	5.8	69.6	HIV+	517	11.20	2,245	750001	517	11.2	858	16400	1,318	38.40	1,150	399	yes	11.28	<12	287	0.446538	0.414438	0.577252	0.655648	1.19524	1.14701	0.8417	0.831006	0.840382	0.847241	0.85052	0.860087	0.854488	0.636453	0.614394	0.625826	0.644394	0.689931	0.641847	0.639386	1.25219	1.26423	1.26949	1.25294	1.1717	1.29657	1.28469	2011-01-26
361276	Female	3260	5.4	64.8	HIV+	875	18.00	1,497	312000	662	15.2	885	399	1,092	22.10	2,272	399	no	6.28	<12	277.857	0.422984	0.457491	0.597887	0.592446	1.20715	1.17804	0.846658	0.824906	0.847537	0.912542	0.834314	0.837636	0.861377	0.658075	0.624187	0.628519	0.729499	0.635135	0.631225	0.651117	1.22382	1.22635	1.28557	1.27863	1.23267	1.25046	1.2819	2011-08-19
B = Baseline / at enrolment
SCAN = time of MRI
Days between = days between GMDS and MRI
[truncated: 19 more columns]
